# Supplementary material for: Suicide before and during the COVID-19 Pandemic: A Systematic Review with Meta-Analysis
Source: Int J Environ Res Public Health. 2023 Feb 14;20(4):3346. doi: 10.3390/ijerph20043346 (PMC9960664; doi:10.3390/ijerph20043346)
Supplement: Supplementary file 1 [file ijerph-20-03346-s001.zip › ijerph-2157738-supplementary.pdf]

## Supplementary Material

**Figure S1.** Sensitivity analysis for non-clinical samples reporting suicidal ideation (leave-one-out method)

**Figure S2.** Funnel plot for non-clinical samples reporting suicidal ideation

**Figure S3.** Sensitivity analysis for clinical samples reporting suicidal ideation (leave-one-out method)

**Figure S4.** Sensitivity analysis for clinical samples reporting suicidal ideation (exclude lower-quality samples)

**Figure S5.** Funnel plot for clinical samples reporting suicidal ideation

**Figure S6.** Sensitivity analysis for non-clinical samples reporting suicide attempt (leave-one-out method)

**Figure S7.** Sensitivity analysis for non-clinical samples reporting suicide attempt (exclude lower-quality samples)

**Figure S8.** Funnel plot for non-clinical samples reporting suicide attempt

**Figure S9.** Sensitivity analysis for clinical samples reporting suicide attempt (leave-one-out method)

**Figure S10.** Sensitivity analysis for clinical samples reporting suicide attempt (exclude lower-quality samples)

**Figure S11.** Funnel plot for clinical samples reporting suicide attempt

**Figure S12.** Sensitivity analysis for samples reporting suicide death (leave-one-out method)

**Figure S13.** Sensitivity analysis for samples reporting suicide death (exclude lower-quality samples)

**Figure S14.** Funnel plot for samples reporting suicide death

**Table S1.** PRISMA checklist

**Table S2.** Risk of bias assessment

**Table S3.** Summary of meta-regression for non-clinical and clinical samples reporting suicidal ideation

**Table S4.** Summary of meta-regression for non-clinical and clinical samples reporting suicide attempt

**Table S5.** Summary of meta-regression for samples reporting death by suicide

**File S1.** Full search strategy

**Figure S1.** Sensitivity analysis for non-clinical samples reporting suicidal ideation (leave-one-out method)

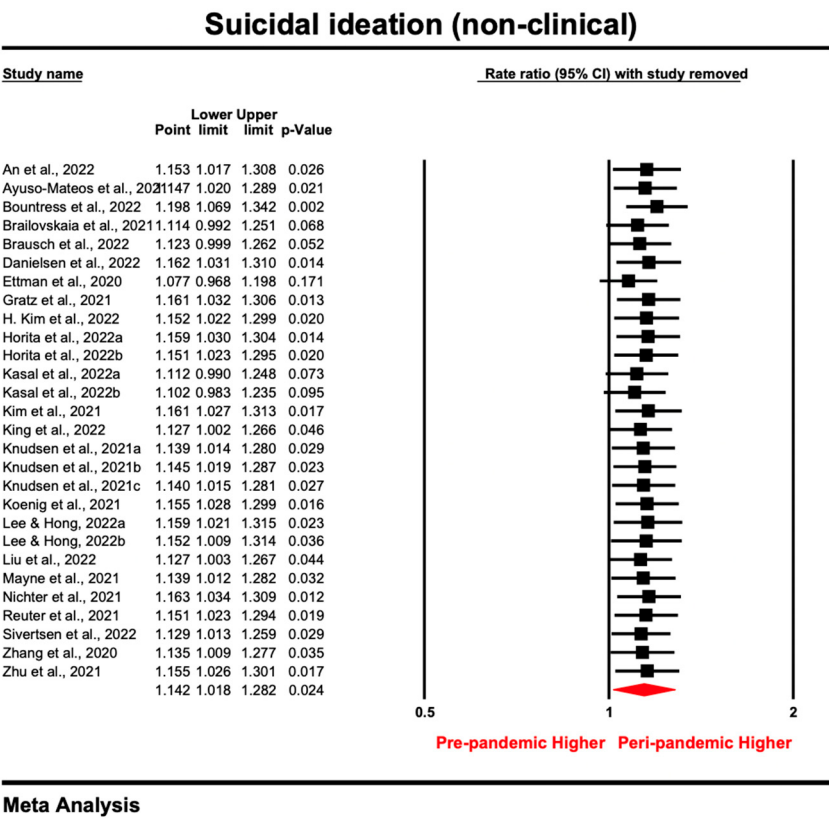

**Figure S2.** Funnel plot for non-clinical samples reporting suicidal ideation

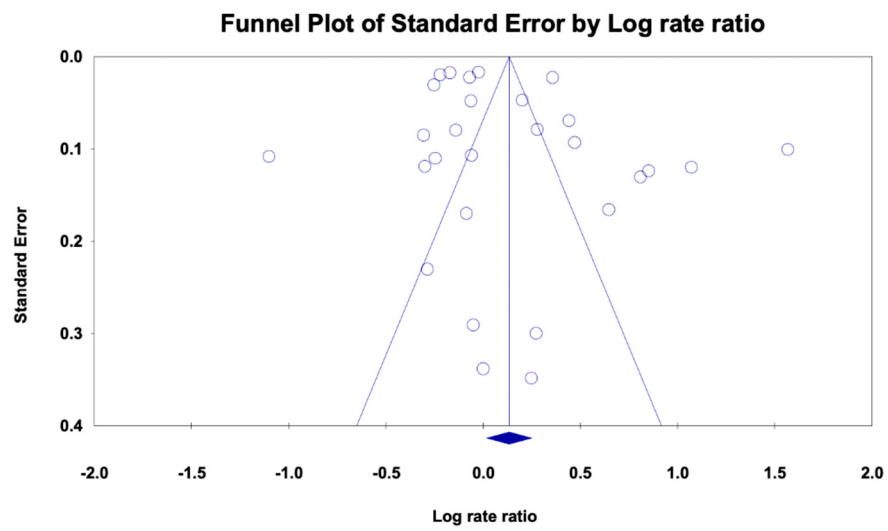

**Figure S3.** Sensitivity analysis for clinical samples reporting suicidal ideation (leave-one-out method)

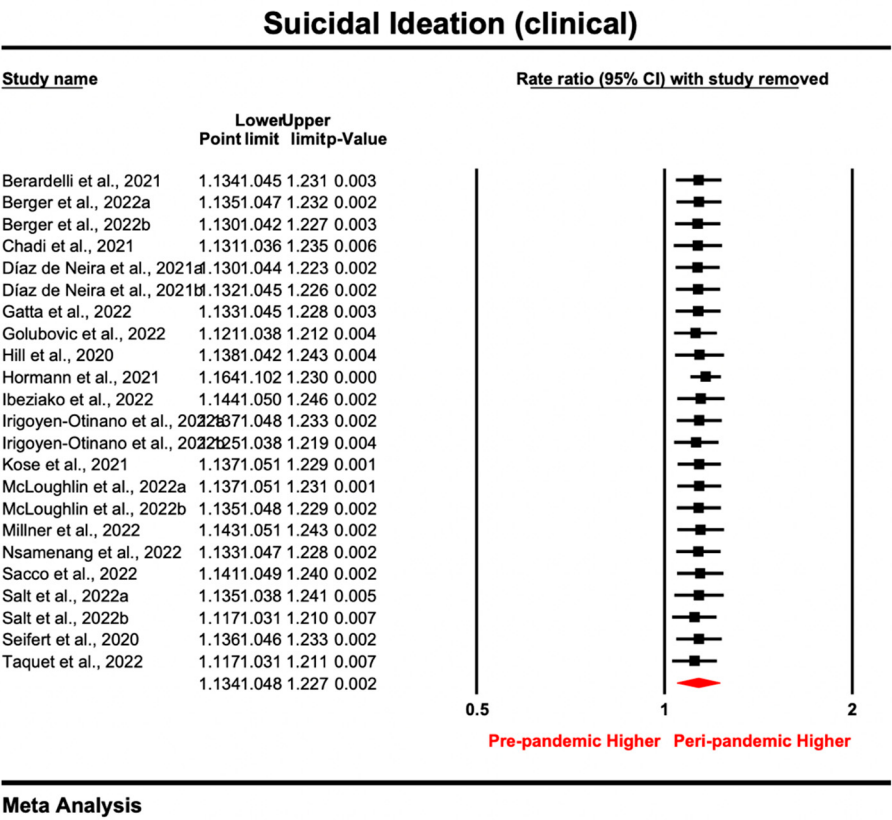

**Figure S4.** Sensitivity analysis for clinical samples reporting suicidal ideation (exclude lower-quality samples)

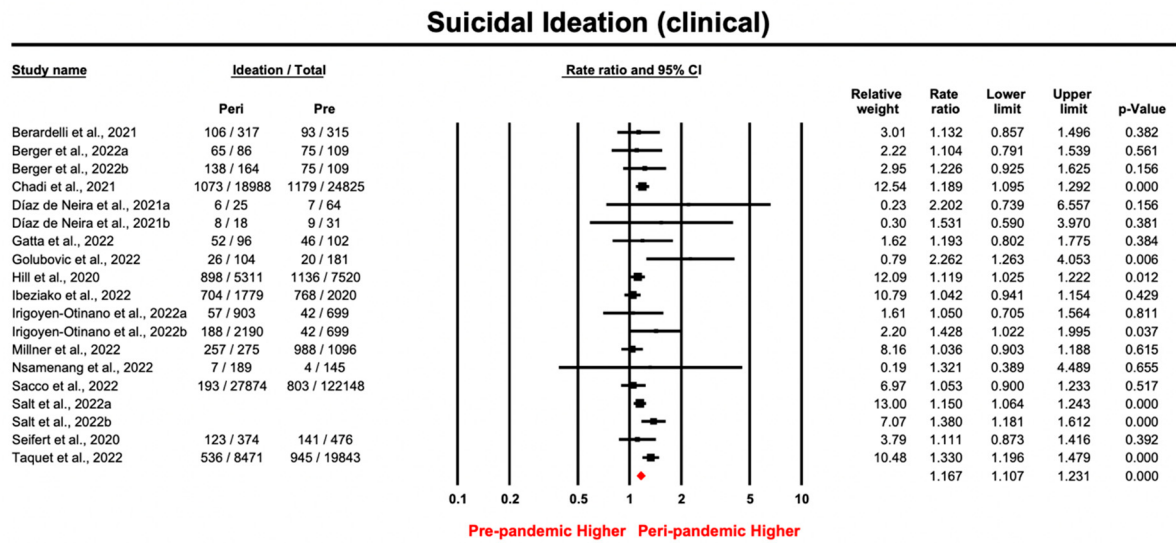

#### Meta Analysis

**Figure S5.** Funnel plot for clinical samples reporting suicidal ideation

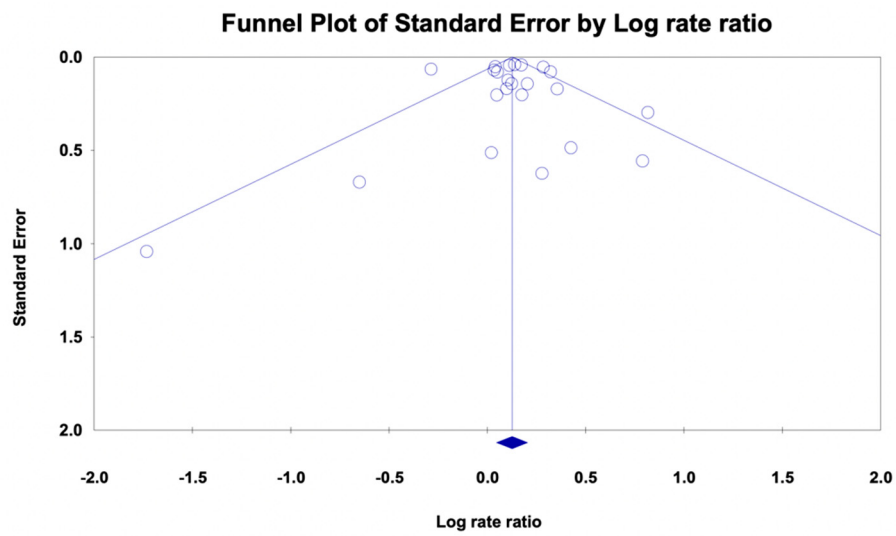

**Figure S6.** Sensitivity analysis for non-clinical samples reporting suicide attempt (leave-one-out method)

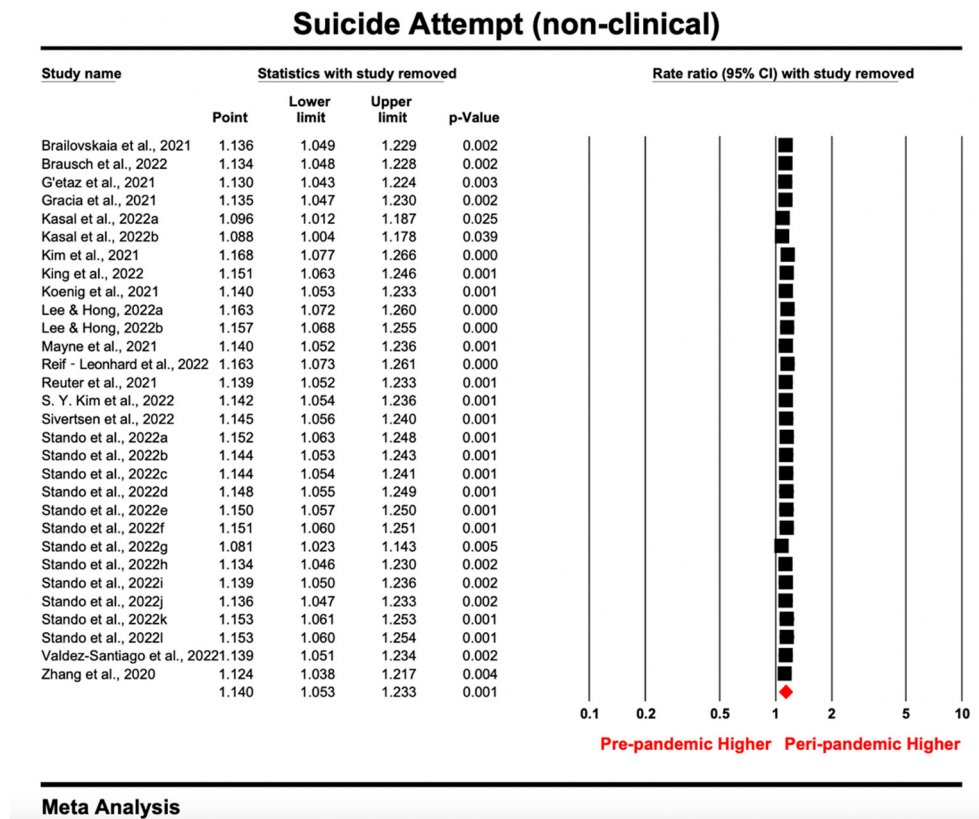

**Figure S7.** Sensitivity analysis for non-clinical samples reporting suicide attempt (exclude lower-quality samples)

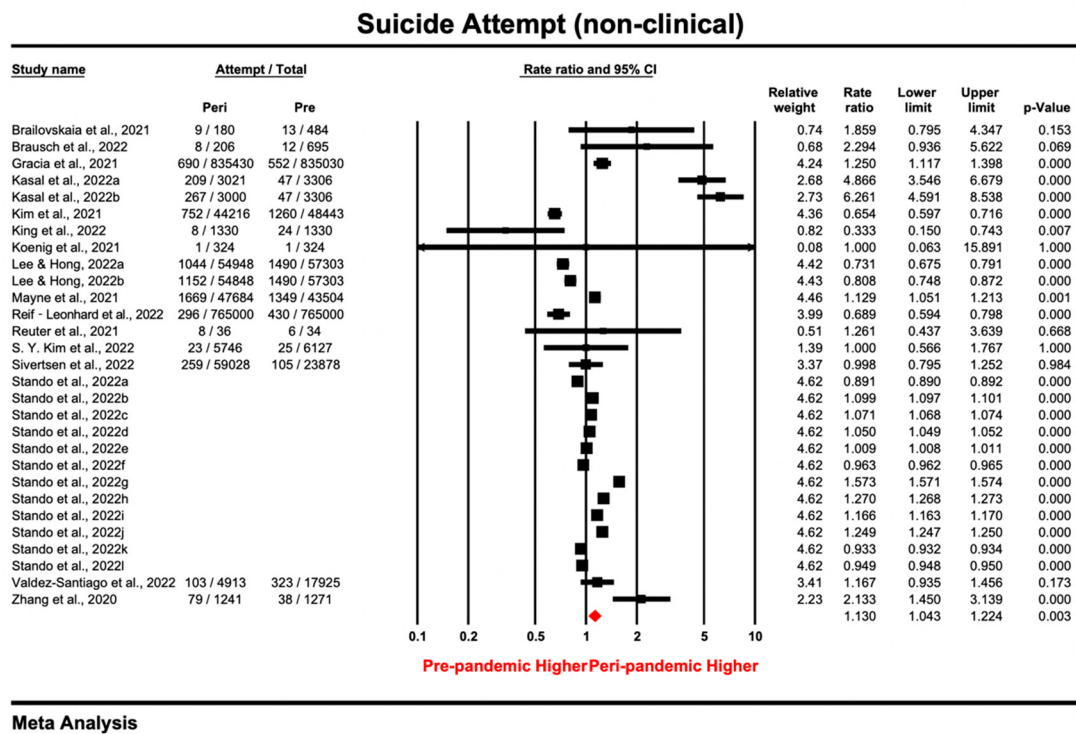

**Figure S8.** Funnel plot for non-clinical samples reporting suicide attempt

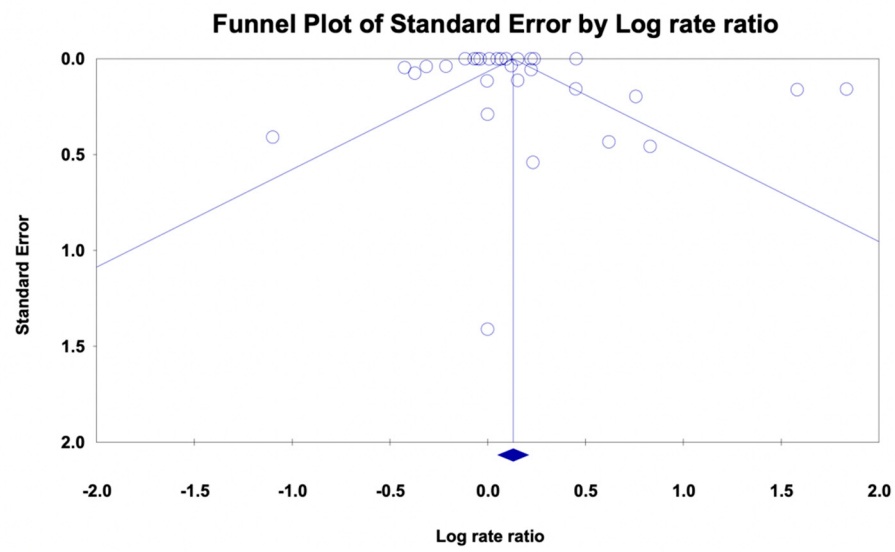

**Figure S9.** Sensitivity analysis for clinical samples reporting suicide attempt (leave-one-out method)

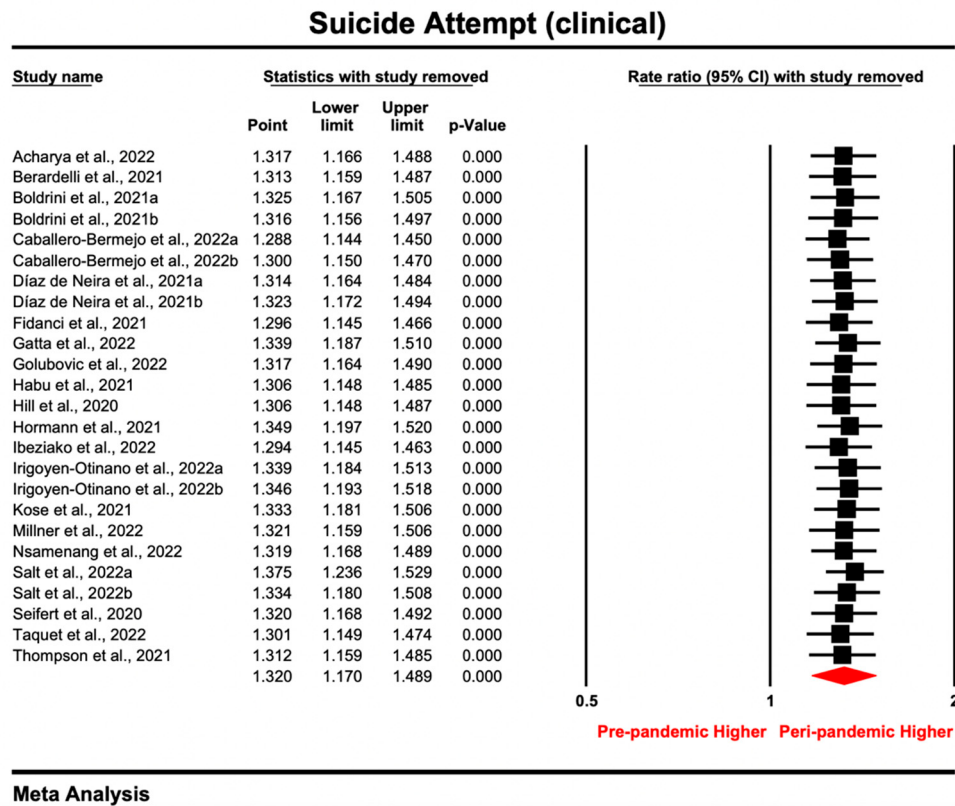

**Figure S10.** Sensitivity analysis for clinical samples reporting suicide attempt (exclude lower-quality samples)

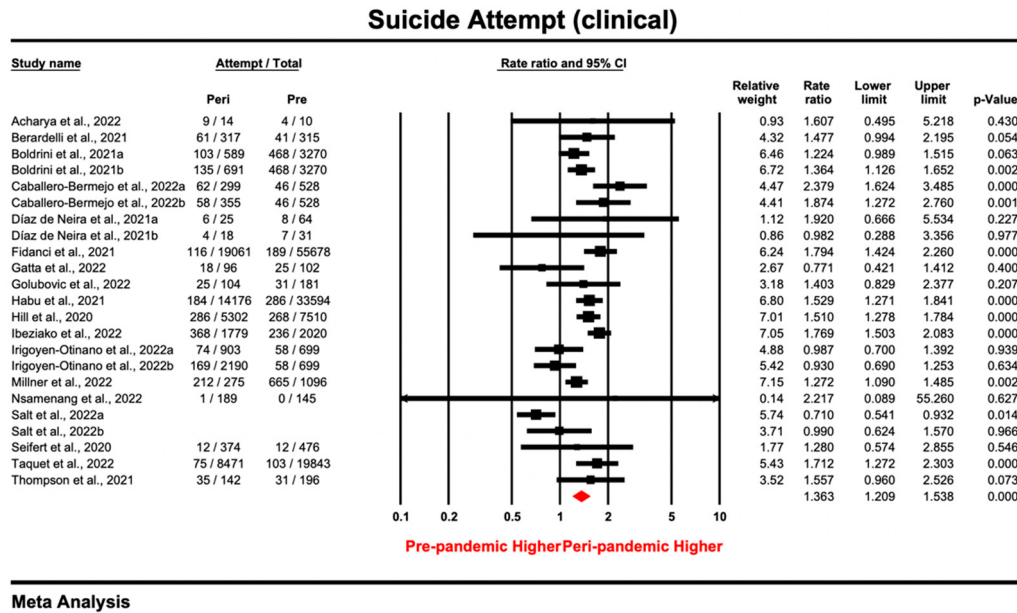

**Figure S11.** Funnel plot for clinical samples reporting suicide attempt

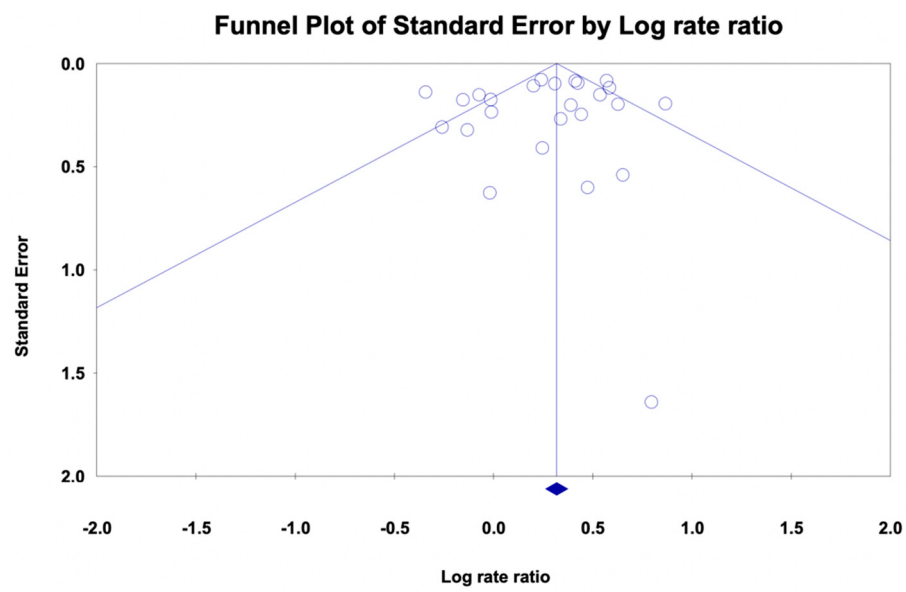

**Figure S12.** Sensitivity analysis for samples reporting suicide death (leave-one-out method)

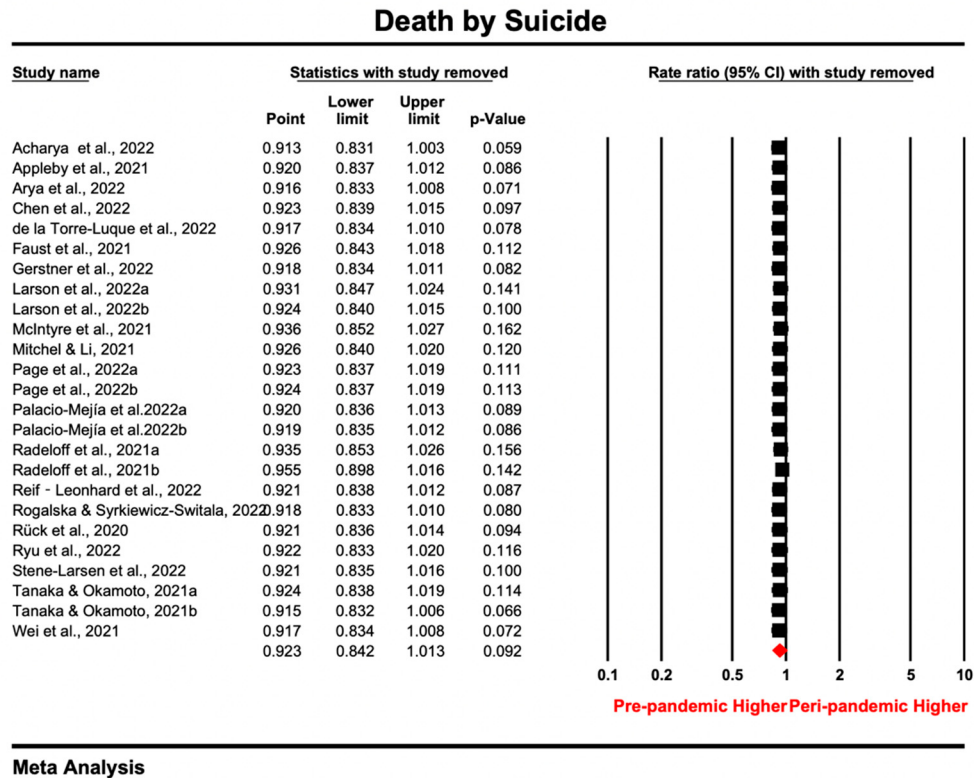

**Figure S13.** Sensitivity analysis for samples reporting suicide death (exclude lower-quality samples)

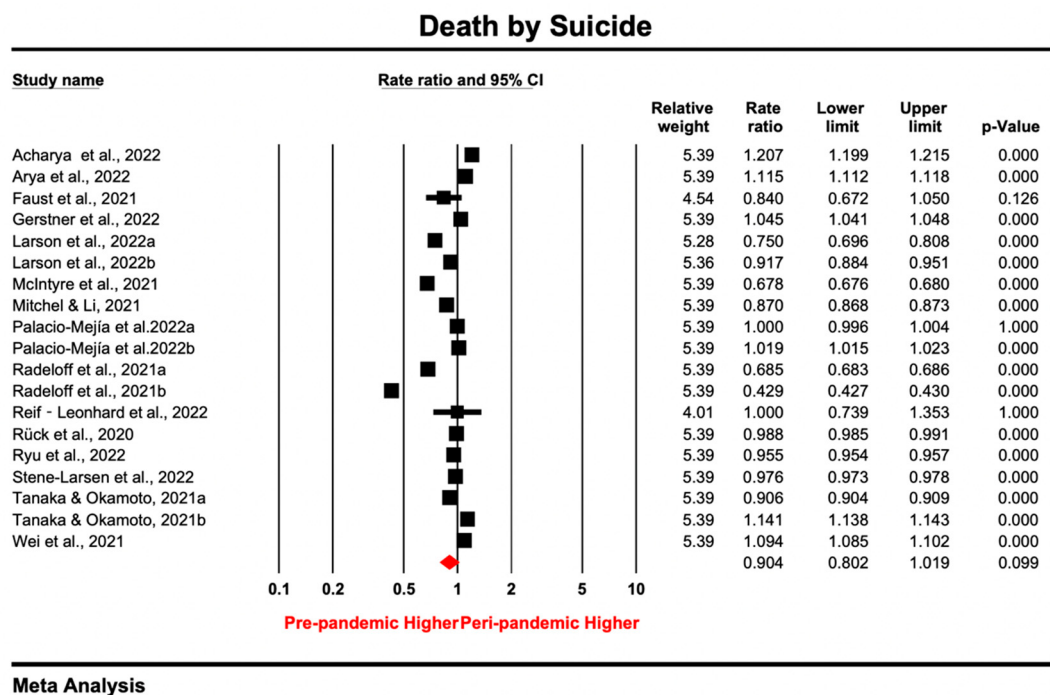

**Figure S14.** Funnel plot for samples reporting suicide death

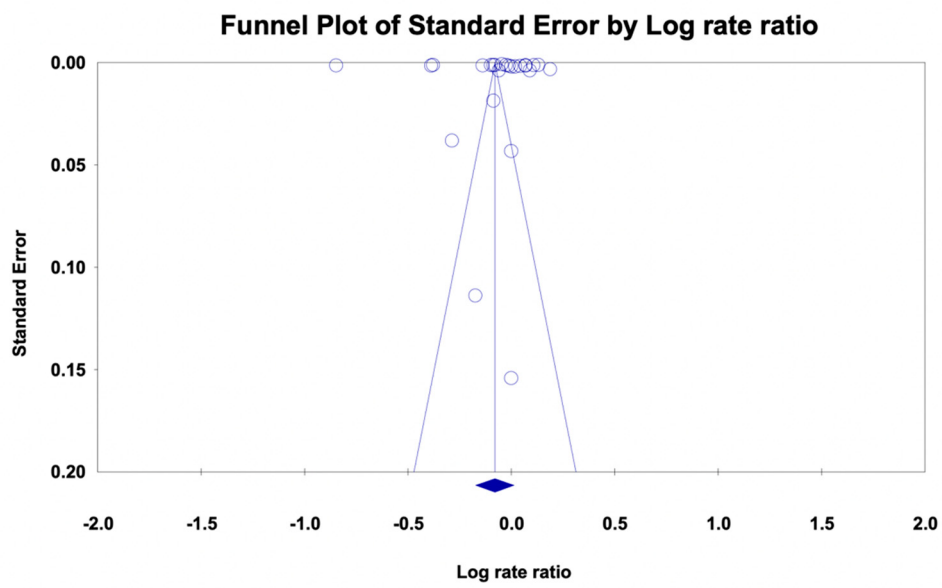

**Table S1.** PRISMA checklist

| Section and Topic    | Item # | Checklist item                                                                                                                                                                                            | Location where item is reported                                                                                                                                                            |
|----------------------|--------|-----------------------------------------------------------------------------------------------------------------------------------------------------------------------------------------------------------|--------------------------------------------------------------------------------------------------------------------------------------------------------------------------------------------|
| <b>TITLE</b>         |        |                                                                                                                                                                                                           |                                                                                                                                                                                            |
| Title                | 1      | Identify the report as a systematic review.                                                                                                                                                               | P1                                                                                                                                                                                         |
| <b>ABSTRACT</b>      |        |                                                                                                                                                                                                           |                                                                                                                                                                                            |
| Abstract             | 2      | See the PRISMA 2020 for Abstracts checklist.                                                                                                                                                              | P1 (Main elements such as objectives, inclusion criteria, information sources, risk of bias assessment tool, effect size, number of included studies, summary estimates, and implications) |
| <b>INTRODUCTION</b>  |        |                                                                                                                                                                                                           |                                                                                                                                                                                            |
| Rationale            | 3      | Describe the rationale for the review in the context of existing knowledge.                                                                                                                               | P1-2                                                                                                                                                                                       |
| Objectives           | 4      | Provide an explicit statement of the objective(s) or question(s) the review addresses.                                                                                                                    | P2                                                                                                                                                                                         |
| <b>METHODS</b>       |        |                                                                                                                                                                                                           |                                                                                                                                                                                            |
| Eligibility criteria | 5      | Specify the inclusion and exclusion criteria for the review and how studies were grouped for the syntheses.                                                                                               | P3 (inclusion and exclusion criteria were set to screen the study design, outcomes, measurement of outcomes, publication status, and language of the potential studies)                    |
| Information sources  | 6      | Specify all databases, registers, websites, organisations, reference lists and other sources searched or consulted to identify studies. Specify the date when each source was last searched or consulted. | P3                                                                                                                                                                                         |
| Search strategy      | 7      | Present the full search strategies for all databases, registers and websites, including any filters and limits used.                                                                                      | P3 & File S1 (Searched terms and the combination had been presented; an example can be found in supplementary file)                                                                        |
| Selection process    | 8      | Specify the methods used to decide whether a study met the inclusion criteria of the                                                                                                                      | P3 (The method and procedure for selection, as well as the                                                                                                                                 |

| Section and Topic             | Item # | Checklist item                                                                                                                                                                                                                                                                                       | Location where item is reported                                                                                                                                        |
|-------------------------------|--------|------------------------------------------------------------------------------------------------------------------------------------------------------------------------------------------------------------------------------------------------------------------------------------------------------|------------------------------------------------------------------------------------------------------------------------------------------------------------------------|
|                               |        | review, including how many reviewers screened each record and each report retrieved, whether they worked independently, and if applicable, details of automation tools used in the process.                                                                                                          | details for automation tools had been presented)                                                                                                                       |
| Data collection process       | 9      | Specify the methods used to collect data from reports, including how many reviewers collected data from each report, whether they worked independently, any processes for obtaining or confirming data from study investigators, and if applicable, details of automation tools used in the process. | P3-4 (The data extraction section provided details on how data for included studies be coded)                                                                          |
| Data items                    | 10a    | List and define all outcomes for which data were sought. Specify whether all results that were compatible with each outcome domain in each study were sought (e.g. for all measures, time points, analyses), and if not, the methods used to decide which results to collect.                        | P3-4 (Main outcomes, measurement tool, and collection time, etc., had been listed in data extraction section with definitions in the introduction part)                |
|                               | 10b    | List and define all other variables for which data were sought (e.g. participant and intervention characteristics, funding sources). Describe any assumptions made about any missing or unclear information.                                                                                         | P4-5 (The other important variables were categorized as identification of the study, methodological, sample characteristic, and potential moderators, and were listed) |
| Study risk of bias assessment | 11     | Specify the methods used to assess risk of bias in the included studies, including details of the tool(s) used, how many reviewers assessed each study and whether they worked independently, and if applicable, details of automation tools used in the process.                                    | P4 (An appropriate tool to assess studies reporting prevalence outcomes had been chosen, and details for the tools had been listed)                                    |
| Effect measures               | 12     | Specify for each outcome the effect measure(s) (e.g. risk ratio, mean difference) used in the synthesis or presentation of results.                                                                                                                                                                  | P4 (An appropriate effect size had been selected to answer our question, and the calculation was specified)                                                            |
| Synthesis methods             | 13a    | Describe the processes used to decide which studies were eligible for each synthesis (e.g. tabulating the study intervention characteristics and comparing against the planned groups for each synthesis (item #5)).                                                                                 | P4                                                                                                                                                                     |

| Section and Topic         | Item # | Checklist item                                                                                                                                                                                                                                              | Location where item is reported                                                                                      |
|---------------------------|--------|-------------------------------------------------------------------------------------------------------------------------------------------------------------------------------------------------------------------------------------------------------------|----------------------------------------------------------------------------------------------------------------------|
|                           | 13b    | Describe any methods required to prepare the data for presentation or synthesis, such as handling of missing summary statistics, or data conversions.                                                                                                       | P4                                                                                                                   |
|                           | 13c    | Describe any methods used to tabulate or visually display results of individual studies and syntheses.                                                                                                                                                      | P4                                                                                                                   |
|                           | 13d    | Describe any methods used to synthesize results and provide a rationale for the choice(s). If meta-analysis was performed, describe the model(s), method(s) to identify the presence and extent of statistical heterogeneity, and software package(s) used. | P4 (The model and software used to synthesize the data, and the criteria to assess heterogeneity was specified)      |
|                           | 13e    | Describe any methods used to explore possible causes of heterogeneity among study results (e.g. subgroup analysis, meta-regression).                                                                                                                        | P4-5(The analysis conducting to explore potential heterogeneity and the way to categorise variables were specified.) |
|                           | 13f    | Describe any sensitivity analyses conducted to assess robustness of the synthesized results.                                                                                                                                                                | P4 (Two sensitivity tests were illustrated to assess the robustness of the pooled estimates)                         |
| Reporting bias assessment | 14     | Describe any methods used to assess risk of bias due to missing results in a synthesis (arising from reporting biases).                                                                                                                                     | P4 (The information had been assessed in the risk of bias assessment)                                                |
| Certainty assessment      | 15     | Describe any methods used to assess certainty (or confidence) in the body of evidence for an outcome.                                                                                                                                                       | P4 (The information had been assessed in the risk of bias assessment)                                                |
| <b>RESULTS</b>            |        |                                                                                                                                                                                                                                                             |                                                                                                                      |
| Study selection           | 16a    | Describe the results of the search and selection process, from the number of records identified in the search to the number of studies included in the review, ideally using a flow diagram.                                                                | P5 (PRISMA flow chart had been displayed to show the process)                                                        |
|                           | 16b    | Cite studies that might appear to meet the inclusion criteria, but which were excluded,                                                                                                                                                                     | Fig 1 (Detailed reasons for excluding studies in each stage)                                                         |

| Section and Topic             | Item # | Checklist item                                                                                                                                                                                                                                                                       | Location where item is reported                                                                                          |
|-------------------------------|--------|--------------------------------------------------------------------------------------------------------------------------------------------------------------------------------------------------------------------------------------------------------------------------------------|--------------------------------------------------------------------------------------------------------------------------|
|                               |        | and explain why they were excluded.                                                                                                                                                                                                                                                  | had been specified)                                                                                                      |
| Study characteristics         | 17     | Cite each included study and present its characteristics.                                                                                                                                                                                                                            | P5 & Table 1-2 (Detailed information and characteristics for several aspects had been demonstrated)                      |
| Risk of bias in studies       | 18     | Present assessments of risk of bias for each included study.                                                                                                                                                                                                                         | Table S2 (Score for each item of each study had been given, and summary of the results were in main text)                |
| Results of individual studies | 19     | For all outcomes, present, for each study: (a) summary statistics for each group (where appropriate) and (b) an effect estimate and its precision (e.g. confidence/credible interval), ideally using structured tables or plots.                                                     | P18, 22 & 25 (The summary for three main outcomes had been organised by tables on each page)                             |
| Results of syntheses          | 20a    | For each synthesis, briefly summarise the characteristics and risk of bias among contributing studies.                                                                                                                                                                               | P18, 22 & 25 (Average on risk of bias score for included studies for each outcome was also given)                        |
|                               | 20b    | Present results of all statistical syntheses conducted. If meta-analysis was done, present for each the summary estimate and its precision (e.g. confidence/credible interval) and measures of statistical heterogeneity. If comparing groups, describe the direction of the effect. | P18, 22 & 25 (Overall estimates, 95% CI, p-value, and sample size for each estimate had been given)                      |
|                               | 20c    | Present results of all investigations of possible causes of heterogeneity among study results.                                                                                                                                                                                       | P19-25 (results for subgroup analysis and meta-regression had been presented with text and tables)                       |
|                               | 20d    | Present results of all sensitivity analyses conducted to assess the robustness of the synthesized results.                                                                                                                                                                           | Figure S1, 3, 4, 6, 7, 9, 10, 12, and 13 (Each figure displays the results of two sensitivity analysis for each outcome) |
| Reporting biases              | 21     | Present assessments of risk of bias due to missing results (arising from reporting biases) for each synthesis assessed.                                                                                                                                                              | Table S2 (The fifth item assess basically the reporting bias for included studies)                                       |
| Certainty of                  | 22     | Present assessments of certainty (or confidence) in the body of evidence for each                                                                                                                                                                                                    | P19-25 (See the 95% CI for each outcome and the sensitivity                                                              |

| Section and Topic              | Item # | Checklist item                                                                                                                                                            | Location where item is reported                                              |
|--------------------------------|--------|---------------------------------------------------------------------------------------------------------------------------------------------------------------------------|------------------------------------------------------------------------------|
| evidence                       |        | outcome assessed.                                                                                                                                                         | analysis results)                                                            |
| <b>DISCUSSION</b>              |        |                                                                                                                                                                           |                                                                              |
| Discussion                     | 23a    | Provide a general interpretation of the results in the context of other evidence.                                                                                         | P25-28 (Results were interpreted using existing evidence and theory)         |
|                                | 23b    | Discuss any limitations of the evidence included in the review.                                                                                                           | P27-28                                                                       |
|                                | 23c    | Discuss any limitations of the review processes used.                                                                                                                     | P27-28 (Limitation for data extraction and subgroup analysis were discussed) |
|                                | 23d    | Discuss implications of the results for practice, policy, and future research.                                                                                            | P27-28                                                                       |
| <b>OTHER INFORMATION</b>       |        |                                                                                                                                                                           |                                                                              |
| Registration and protocol      | 24a    | Provide registration information for the review, including register name and registration number, or state that the review was not registered.                            | P3 (Number for PROSPERO registration was provided)                           |
|                                | 24b    | Indicate where the review protocol can be accessed, or state that a protocol was not prepared.                                                                            | P3                                                                           |
|                                | 24c    | Describe and explain any amendments to information provided at registration or in the protocol.                                                                           | P3                                                                           |
| Support                        | 25     | Describe sources of financial or non-financial support for the review, and the role of the funders or sponsors in the review.                                             | --                                                                           |
| Competing interests            | 26     | Declare any competing interests of review authors.                                                                                                                        | --                                                                           |
| Availability of data, code and | 27     | Report which of the following are publicly available and where they can be found: template data collection forms; data extracted from included studies; data used for all | --                                                                           |

| Section and Topic | Item # | Checklist item                                                   | Location where item is reported |
|-------------------|--------|------------------------------------------------------------------|---------------------------------|
| other materials   |        | analyses; analytic code; any other materials used in the review. |                                 |

**Table S2.** Risk of bias assessment

| <b>Study/item</b>                                | <b>1</b> | <b>2</b> | <b>3*</b> | <b>4</b> | <b>5</b> | <b>6</b> | <b>7</b> | <b>8</b> | <b>9</b> | <b>Total</b> |
|--------------------------------------------------|----------|----------|-----------|----------|----------|----------|----------|----------|----------|--------------|
| <b>Studies for suicidal ideation and attempt</b> |          |          |           |          |          |          |          |          |          |              |
| Acharya et al. (2022)                            | yes      | yes      | yes       | yes      | yes      | no       | no       | yes      | yes      | 7            |
| An et al. (2022)                                 | no       | yes      | yes       | yes      | yes      | yes      | yes      | yes      | yes      | 8            |
| Ayuso-Mateos et al. (2021)                       | yes      | yes      | yes       | yes      | yes      | no       | no       | yes      | yes      | 7            |
| Berardelli et al. (2021)                         | yes      | no       | yes       | yes      | yes      | yes      | yes      | yes      | no       | 7            |
| Berger et al. (2022)                             | no       | yes      | yes       | yes      | yes      | no       | no       | yes      | yes      | 6            |
| Boldrini et al. (2021)                           | yes      | no       | yes       | yes      | yes      | yes      | yes      | yes      | yes      | 8            |
| Bountress et al. (2022)                          | no       | no       | yes       | yes      | yes      | yes      | yes      | yes      | yes      | 7            |
| Brailovskaia et al. (2021)                       | no       | yes      | yes       | yes      | no       | yes      | yes      | yes      | no       | 6            |
| Brausch et al. (2022)                            | no       | no       | yes       | yes      | yes      | yes      | yes      | yes      | yes      | 7            |
| Caballero-Bermejo et al. (2022)                  | yes      | yes      | yes       | yes      | yes      | no       | no       | yes      | yes      | 7            |
| Chadi et al. (2021)                              | no       | yes      | yes       | no       | yes      | yes      | no       | yes      | yes      | 6            |
| Danielsen et al. (2022)                          | yes      | no       | yes       | yes      | yes      | no       | no       | yes      | yes      | 6            |
| Díaz de Neira et al. (2021)                      | yes      | yes      | no        | yes      | yes      | no       | no       | yes      | yes      | 6            |
| Ettman et al. (2020)                             | yes      | no       | yes       | yes      | yes      | yes      | yes      | yes      | no       | 7            |
| Fidancı et al. (2021)                            | no       | yes      | yes       | yes      | yes      | no       | no       | yes      | yes      | 6            |
| Gatta et al. (2022)                              | yes      | no       | yes       | yes      | no       | yes      | yes      | yes      | no       | 6            |
| G'etaz et al. (2021)                             | yes      | no       | yes       | no       | yes      | no       | no       | yes      | no       | 4            |
| Golubovic et al. (2022)                          | no       | no       | yes       | yes      | yes      | yes      | yes      | yes      | yes      | 7            |
| Gracia et al. (2021)                             | no       | yes      | yes       | no       | yes      | yes      | yes      | yes      | yes      | 7            |
| Gratz et al. (2021)                              | no       | yes      | yes       | yes      | yes      | no       | no       | yes      | yes      | 6            |
| H. Kim et al. (2022)                             | yes      | yes      | yes       | yes      | yes      | yes      | yes      | yes      | yes      | 9            |
| Habu et al. (2021)                               | yes      | yes      | yes       | yes      | yes      | no       | no       | yes      | yes      | 7            |
| Hill et al. (2020)71                             | yes      | yes      | yes       | yes      | yes      | yes      | yes      | yes      | no       | 8            |
| Horita et al. (2022)                             | no       | yes      | yes       | yes      | yes      | no       | no       | yes      | yes      | 6            |
| Hörmann et al. (2021)                            | yes      | no       | yes       | yes      | yes      | no       | no       | yes      | no       | 5            |
| Ibeziako et al. (2022)                           | no       | yes      | yes       | yes      | yes      | yes      | no       | yes      | yes      | 7            |
| Irigoyen-Otiñano et al. (2022)                   | yes      | yes      | yes       | yes      | yes      | yes      | no       | yes      | yes      | 8            |
| Kasal et al., (2022)                             | yes      | yes      | yes       | yes      | yes      | yes      | yes      | yes      | yes      | 9            |
| Kim et al. (2021)                                | yes      | yes      | yes       | yes      | yes      | no       | no       | yes      | yes      | 7            |
| King et al. (2022)                               | yes      | yes      | yes       | yes      | yes      | yes      | yes      | yes      | yes      | 9            |
| Knudsen et al. (2021)                            | yes      | yes      | yes       | yes      | yes      | yes      | yes      | yes      | yes      | 9            |
| Koenig et al. (2021)                             | yes      | yes      | yes       | yes      | yes      | yes      | yes      | yes      | yes      | 9            |
| Kose et al. (2021)                               | no       | yes      | yes       | no       | yes      | no       | no       | yes      | yes      | 5            |
| Lee & Hong (2022)                                | yes      | yes      | yes       | yes      | yes      | yes      | yes      | yes      | yes      | 9            |
| Liu et al. (2022)                                | yes      | yes      | yes       | yes      | yes      | yes      | yes      | yes      | yes      | 9            |
| Mayne et al. (2021)                              | no       | no       | yes       | yes      | yes      | yes      | yes      | yes      | no       | 6            |
| McLoughlin et al. (2022)                         | no       | yes      | no        | yes      | yes      | no       | no       | yes      | yes      | 5            |
| Millner et al. (2022)                            | no       | no       | yes       | yes      | yes      | yes      | no       | yes      | yes      | 6            |
| Nichter et al. (2021)                            | yes      | yes      | yes       | yes      | yes      | yes      | yes      | yes      | yes      | 9            |
| Nsamenang et al. (2022)                          | yes      | yes      | yes       | yes      | yes      | no       | no       | yes      | yes      | 7            |

|                                     |     |     |     |     |     |     |     |     |     |   |
|-------------------------------------|-----|-----|-----|-----|-----|-----|-----|-----|-----|---|
| Reif-Leonhard et al. (2022)         | yes | yes | yes | no  | yes | yes | yes | yes | yes | 8 |
| Reuter et al. (2021)                | no  | yes | yes | yes | yes | no  | no  | yes | yes | 6 |
| S. Y. Kim et al. (2022)             | yes | 9 |
| Sacco et al. (2022)                 | no  | yes | 8 |
| Salt et al. (2022)                  | yes | yes | yes | yes | yes | yes | no  | yes | yes | 8 |
| Seifert et al. (2020)               | no  | no  | yes | yes | yes | yes | yes | yes | no  | 6 |
| Sivertsen et al. (2022)             | yes | no  | 8 |
| Stan' do et al. (2022)              | yes | 9 |
| Taquet et al. (2022)                | yes | no  | yes | yes | yes | yes | yes | yes | no  | 7 |
| Thompson et al. (2021)              | no  | no  | yes | yes | yes | yes | yes | yes | no  | 6 |
| Valdez-Santiago et al. (2022)       | yes | no  | 8 |
| Zhang et al. (2020)                 | no  | no  | yes | yes | yes | yes | no  | yes | yes | 6 |
| Zhu et al. (2021)                   | no  | no  | yes | yes | yes | yes | yes | yes | no  | 6 |
| <b>Studies for death by suicide</b> |     |     |     |     |     |     |     |     |     |   |
| Acharya et al. (2022)               | yes | 9 |
| Appleby et al. (2021)               | no  | yes | yes | no  | yes | no  | no  | yes | yes | 5 |
| Arya et al. (2022)                  | yes | yes | yes | yes | yes | no  | no  | yes | yes | 7 |
| Chen et al. (2022)                  | yes | yes | yes | no  | yes | no  | no  | yes | yes | 6 |
| de la Torre-Luque et al. (2022)     | yes | yes | yes | no  | yes | no  | no  | yes | yes | 6 |
| Faust et al. (2021)                 | yes | yes | yes | yes | yes | no  | no  | yes | yes | 7 |
| Gerstner et al. (2022)              | yes | 9 |
| Larson et al. (2022)                | yes | 9 |
| McIntyre et al. (2021)              | yes | yes | yes | no  | yes | yes | yes | yes | yes | 8 |
| Mitchel & Li (2021)                 | yes | yes | yes | yes | yes | no  | no  | yes | yes | 7 |
| Page et al. (2022)                  | yes | yes | yes | yes | yes | no  | no  | no  | yes | 6 |
| Palacio-Mejía et al. (2022)         | yes | 9 |
| Radeloff et al. (2021)              | yes | yes | yes | no  | yes | yes | yes | yes | yes | 8 |
| Reif-Leonhard et al. (2022)         | no  | yes | 8 |
| Rogalska& Syrkiewicz-Switała (2022) | yes | yes | yes | no  | yes | no  | no  | yes | yes | 6 |
| Rück et al. (2020)                  | yes | yes | yes | no  | yes | yes | yes | yes | yes | 8 |
| Ryu et al. (2022)                   | yes | 9 |
| Stene-Larsen et al. (2022)          | yes | 9 |
| Tanaka & Okamoto (2021)             | yes | 9 |
| Wei et al. (2021)                   | yes | 9 |

\* The third item assessed the bias on sample size. All data for death by suicide were national or regional level, which would be of low risk of bias. For studies reporting suicidal ideation and attempt, if sample size calculation was conducted, yes will be marked for this item; if no prior estimation, we conducted an estimation based on the formula  $N = Z^2 * p * (1-p) / d^2$  according to JBI Critical Appraisal Instrument, to see if the sample size of the included studies fulfilled the responding criterion. The prevalence of suicidal ideation and suicide attempt ranged from 2% to 50% and 0.3% to 64% in our included samples, thus, the minimum sample size for ideation and attempt would be around 30 and 5.

**Table S3.** Summary of meta-regression for non-clinical and clinical samples reporting suicidal ideation

| <b>Covariate</b>  | <b>Beta</b> | <b>Standard Error</b> | <b>95% Lower</b> | <b>95% Upper</b> | <b><i>p</i> - value</b> |
|-------------------|-------------|-----------------------|------------------|------------------|-------------------------|
| Female proportion | -0.17       | 0.41                  | -0.98            | 0.65             | 0.69                    |
| Study quality     | 0.06        | 0.36                  | -1.03            | 0.39             | 0.38                    |
| Female proportion | 0.40        | 0.45                  | -0.48            | 1.27             | 0.37                    |
| Study quality     | 0.08        | 0.04                  | 0.01             | 0.16             | 0.03                    |

**Table S4.** Summary of meta-regression for non-clinical and clinical samples reporting suicide attempt

| <b>Covariate</b>  | <b>Beta</b> | <b>Standard Error</b> | <b>95% Lower</b> | <b>95% Upper</b> | <b><i>p</i> - value</b> |
|-------------------|-------------|-----------------------|------------------|------------------|-------------------------|
| Female proportion | 0.13        | 0.11                  | -0.08            | 0.345            | 0.21                    |
| Study quality     | -0.03       | 0.30                  | -0.19            | 0.94             | 0.39                    |
| Female proportion | -0.50       | 0.45                  | -1.39            | 0.38             | 0.27                    |
| Study quality     | -0.02       | 0.07                  | -0.15            | 0.11             | 0.79                    |

**Table S5.** Summary of meta-regression for samples reporting death by suicide

| <b>Moderators</b>            | <b>Beta</b> | <b>Standard Error</b> | <b>95% Lower</b> | <b>95% Upper</b> | <b><i>p</i> -value</b> |
|------------------------------|-------------|-----------------------|------------------|------------------|------------------------|
| GDP (Peri/Pre)               | -0.31       | 0.66                  | -1.60            | 0.97             | 0.63                   |
| Unemployment rate (Peri/Pre) | -0.01       | 0.095                 | -0.20            | 0.17             | 0.91                   |
| Resilience score             | -0.01       | 0.01                  | -0.02            | 0.01             | 0.38                   |
| Stringency index             | 0.003       | 0.003                 | -0.003           | 0.01             | 0.33                   |
| Containment and health index | -0.00009    | 0.004                 | -0.008           | 0.008            | 0.98                   |
| Economic support index       | -0.0008     | 0.001                 | -0.004           | 0.002            | 0.59                   |

**File S1.** Full search strategy

**A. Search terms** (Following the CoCoPop mnemonic)

● **Condition**

(suicid\* OR "suicidal ideation" OR "suicidal thoughts" OR "suicidal plan" OR "suicide attempt" OR "completed suicide" OR "death by suicide") AND (COVID\* OR coronavirus OR "2019-ncov" OR "sars-cov-2" OR "cov-19" OR "2019 pandemic")

● **Context**

"COVID\*" OR coronavirus OR "2019-ncov" OR "sars-cov-2" OR "cov-19" OR "2019 pandemic"

**B. Search strategy** (An example from PubMed)

Search: ((suicid\*[Title/Abstract] OR "suicidal ideation"[Title/Abstract] OR "suicidal thoughts"[Title/Abstract] OR "suicidal plan"[Title/Abstract] OR "suicide attempt"[Title/Abstract] OR "completed suicide"[Title/Abstract] OR "death by suicide"[Title/Abstract])) AND ((COVID\*[Title/Abstract] OR coronavirus[Title/Abstract] OR "2019-ncov"[Title/Abstract] OR "sars-cov-2"[Title/Abstract] OR "cov-19"[Title/Abstract] OR "2019 pandemic"[Title/Abstract]))

("suicid\*" [Title/Abstract] OR "suicidal ideation"[Title/Abstract] OR "suicidal thoughts"[Title/Abstract] OR "suicidal plan"[Title/Abstract] OR "suicide attempt"[Title/Abstract] OR "completed suicide"[Title/Abstract] OR "death by suicide"[Title/Abstract]) AND ("covid\*" [Title/Abstract] OR "coronavirus"[Title/Abstract] OR "2019-ncov"[Title/Abstract] OR "sars-cov-2"[Title/Abstract] OR "cov-19"[Title/Abstract] OR "2019 pandemic"[Title/Abstract])
